# Supplementary material
Source: Springer Nature journal article supplement (https://www.springermedizin.de/resource/supplementary/12913_2011_2357_MOESM2_ESM.pdf/9530466)

Self-reports

MBS records

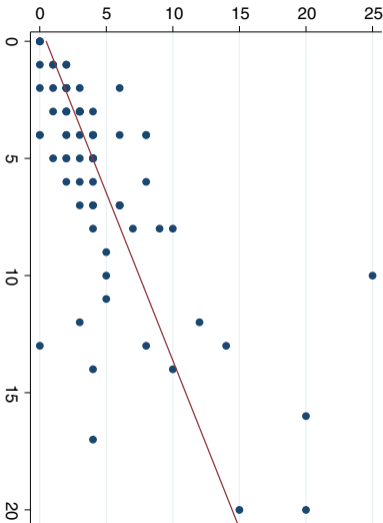

Supplement: MOESM2 [file 9530466]
